# Supplementary figures and images for: Effects of Hypocalcemic Vitamin D Analogs in the Expression of DNA Damage Induced in Minilungs from hESCs: Implications for Lung Fibrosis
Source: MDPI journal article supplement (doi:10.3390/ijms23094921), 2022-04-28

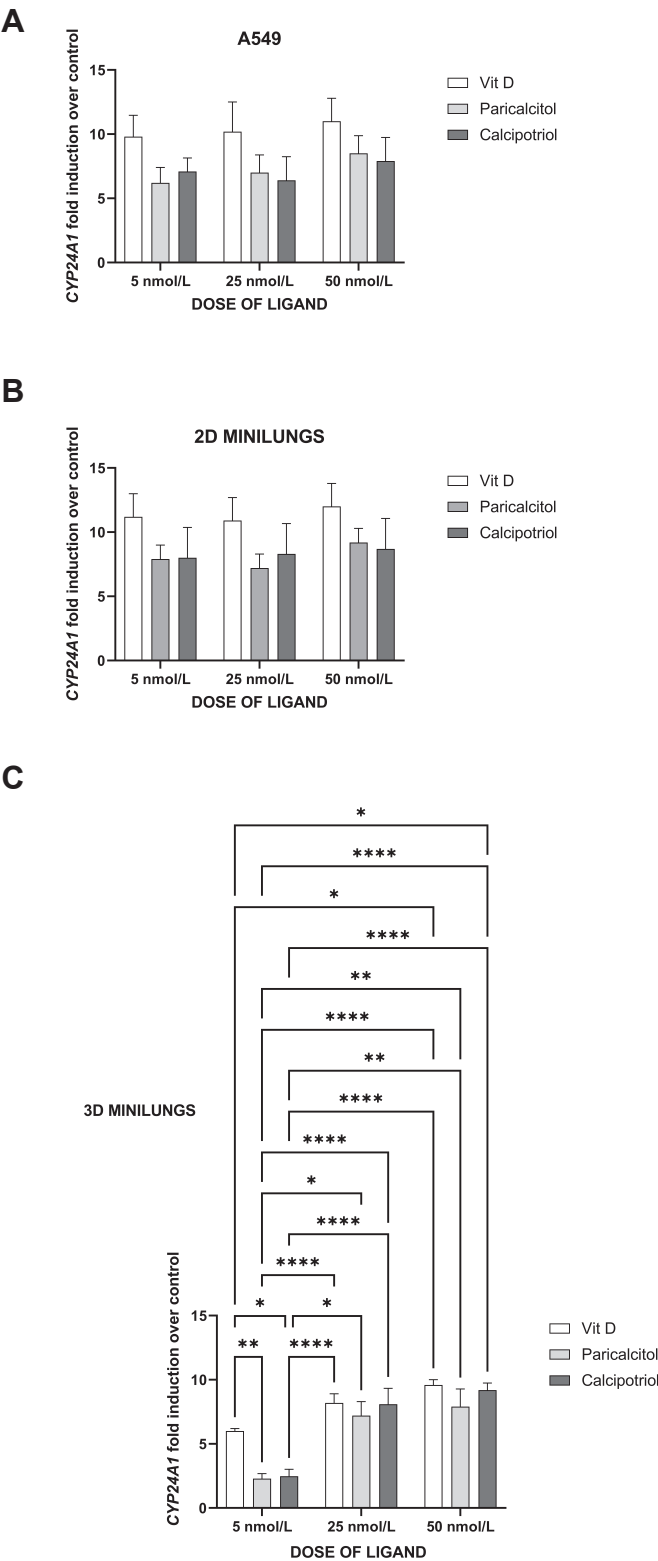

Supplement: s1 [file s1]
